# Supplementary material for: Environmental Influences on Physical Activity among Rural Adults in Montana, United States: Views from Built Environment Audits, Resident Focus Groups, and Key Informant Interviews
Source: Int J Environ Res Public Health. 2017 Oct 4;14(10):1173. doi: 10.3390/ijerph14101173 (PMC5664674; doi:10.3390/ijerph14101173)
Supplement: Supplementary file 1 [file ijerph-14-01173-s001.pdf]

## Supplementary materials

**Table S1.** Individual item availability for the built environment audits

| Item                         | Town A | Town B | Town C | Town D | Town E | Town F | Town G | Town H |
|------------------------------|--------|--------|--------|--------|--------|--------|--------|--------|
| Retail Business              |        |        |        |        |        |        |        |        |
| Agricultural store           | 1 *    | 1      | 1      | 1      | 1      | 1      | 1      | 0 **   |
| Appliance store              | 1      | 0      | 0      | 0      | 0      | 1      | 0      | 1      |
| Automobile sales             | 1      | 1      | 1      | 1      | 1      | 1      | 1      | 1      |
| Convenience store            | 1      | 1      | 1      | 1      | 1      | 1      | 1      | 1      |
| Pharmacy                     | 1      | 0      | 1      | 1      | 1      | 1      | 1      | 1      |
| Florist                      | 1      | 0      | 1      | 1      | 1      | 1      | 0      | 1      |
| Furniture store              | 1      | 0      | 0      | 1      | 0      | 1      | 0      | 1      |
| Gas station                  | 1      | 1      | 1      | 1      | 1      | 1      | 1      | 1      |
| Hardware store               | 1      | 1      | 1      | 1      | 1      | 1      | 1      | 1      |
| Pawn shop                    | 1      | 0      | 0      | 0      | 0      | 0      | 0      | 1      |
| Retail store                 | 1      | 1      | 1      | 1      | 1      | 1      | 1      | 1      |
| Hunting store                | 1      | 1      | 0      | 0      | 1      | 0      | 0      | 1      |
| Multi-service stores         | 1      | 1      | 1      | 1      | 1      | 1      | 1      | 1      |
| Professional services        |        |        |        |        |        |        |        |        |
| Bank                         | 1      | 0      | 1      | 1      | 1      | 1      | 1      | 1      |
| Barber shop                  | 1      | 1      | 1      | 1      | 1      | 1      | 1      | 1      |
| Dry cleaning                 | 0      | 0      | 0      | 0      | 0      | 0      | 0      | 1      |
| Hotel                        | 1      | 1      | 1      | 1      | 1      | 1      | 1      | 1      |
| Laundromat                   | 1      | 1      | 1      | 0      | 0      | 1      | 0      | 0      |
| Post office                  | 1      | 0      | 0      | 1      | 1      | 1      | 1      | 1      |
| Train/bus station            | 0      | 0      | 0      | 1      | 0      | 1      | 0      | 1      |
| Community services           |        |        |        |        |        |        |        |        |
| Church                       | 1      | 1      | 1      | 1      | 1      | 1      | 1      | 1      |
| Criminal justice             | 1      | 1      | 1      | 0      | 1      | 1      | 1      | 0      |
| Day care                     | 0      | 0      | 0      | 1      | 1      | 0      | 0      | 0      |
| Entertainment                | 1      | 0      | 1      | 1      | 1      | 1      | 1      | 1      |
| Health clinic                | 1      | 1      | 1      | 1      | 1      | 1      | 1      | 1      |
| Library                      | 1      | 1      | 1      | 1      | 1      | 1      | 1      | 1      |
| Museum                       | 0      | 1      | 1      | 0      | 0      | 0      | 1      | 1      |
| Police station               | 1      | 1      | 1      | 1      | 1      | 0      | 1      | 0      |
| School                       | 1      | 1      | 1      | 1      | 1      | 1      | 1      | 1      |
| Social service               | 1      | 1      | 1      | 1      | 1      | 1      | 1      | 1      |
| Municipal building           | 1      | 1      | 1      | 1      | 1      | 1      | 1      | 1      |
| Town amenities               |        |        |        |        |        |        |        |        |
| Benches                      | 1      | 1      | 1      | 1      | 1      | 1      | 1      | 1      |
| Trash cans                   | 1      | 1      | 1      | 1      | 1      | 1      | 1      | 1      |
| Water fountains              | 0      | 0      | 0      | 0      | 0      | 0      | 0      | 0      |
| Covered bus stops            | 0      | 0      | 0      | 0      | 0      | 0      | 0      | 0      |
| Outdoor lighting             | 1      | 1      | 1      | 1      | 1      | 1      | 1      | 1      |
| Physical activity facilities |        |        |        |        |        |        |        |        |

|                                            |   |   |   |   |   |   |   |   |
|--------------------------------------------|---|---|---|---|---|---|---|---|
| Parks                                      | 1 | 1 | 1 | 1 | 1 | 1 | 1 | 1 |
| Indoor recreational facilities             | 1 | 0 | 0 | 0 | 1 | 1 | 0 | 1 |
| Playgrounds                                | 1 | 1 | 1 | 1 | 1 | 1 | 1 | 1 |
| Sports fields/courts                       | 1 | 1 | 1 | 1 | 1 | 1 | 1 | 1 |
| Pools                                      | 1 | 1 | 1 | 0 | 1 | 1 | 0 | 1 |
| Trails                                     | 0 | 1 | 1 | 0 | 0 | 0 | 1 | 1 |
| <b>Town aesthetics</b>                     |   |   |   |   |   |   |   |   |
| Trees                                      | 1 | 1 | 1 | 1 | 1 | 1 | 1 | 1 |
| Flowers                                    | 1 | 1 | 1 | 1 | 1 | 1 | 1 | 1 |
| Decorative banners                         | 1 | 1 | 1 | 1 | 0 | 0 | 0 | 1 |
| Sculptures                                 | 0 | 1 | 0 | 0 | 0 | 0 | 0 | 1 |
| Pleasant buildings                         | 1 | 1 | 1 | 1 | 1 | 1 | 1 | 1 |
| Awnings                                    | 1 | 1 | 1 | 0 | 1 | 1 | 0 | 1 |
| Open space                                 | 1 | 1 | 1 | 1 | 1 | 0 | 0 | 1 |
| <b>Sidewalk conditions</b>                 |   |   |   |   |   |   |   |   |
| Sidewalk present                           | 1 | 1 | 1 | 1 | 1 | 1 | 1 | 1 |
| Sidewalk continuous                        | 0 | 0 | 0 | 0 | 0 | 0 | 0 | 1 |
| Sidewalk without slope                     | 1 | 1 | 1 | 0 | 1 | 1 | 1 | 1 |
| Sidewalk even                              | 0 | 1 | 0 | 0 | 0 | 0 | 0 | 0 |
| Sidewalk without obstructions              | 1 | 1 | 1 | 0 | 1 | 0 | 1 | 1 |
| Sidewalk wide                              | 1 | 1 | 1 | 1 | 1 | 1 | 1 | 1 |
| Sidewalk clean                             | 1 | 1 | 1 | 1 | 1 | 1 | 1 | 1 |
| Sidewalk without graffiti                  | 1 | 1 | 1 | 1 | 1 | 1 | 1 | 1 |
| Sidewalk with connection                   | 1 | 0 | 1 | 1 | 0 | 0 | 0 | 1 |
| <b>Condition of town center</b>            |   |   |   |   |   |   |   |   |
| Litter                                     | 0 | 0 | 0 | 1 | 0 | 1 | 0 | 0 |
| Graffiti                                   | 0 | 0 | 0 | 0 | 0 | 0 | 0 | 0 |
| Unkempt lawns                              | 1 | 0 | 0 | 1 | 0 | 0 | 1 | 0 |
| Window bars                                | 0 | 0 | 1 | 0 | 0 | 0 | 1 | 0 |
| Broken windows                             | 0 | 0 | 0 | 0 | 0 | 0 | 1 | 0 |
| Vacant buildings                           | 1 | 1 | 1 | 1 | 1 | 1 | 1 | 1 |
| Vacant lots                                | 1 | 1 | 1 | 1 | 1 | 1 | 1 | 1 |
| Abandoned vehicles                         | 0 | 1 | 1 | 0 | 1 | 1 | 1 | 0 |
| Road kill                                  | 0 | 0 | 0 | 0 | 0 | 0 | 0 | 0 |
| Dumpsters                                  | 1 | 1 | 0 | 1 | 1 | 1 | 1 | 1 |
| Power plant                                | 0 | 0 | 0 | 0 | 0 | 0 | 1 | 0 |
| Landfill                                   | 0 | 0 | 0 | 0 | 0 | 0 | 0 | 0 |
| <b>Street &amp; intersection condition</b> |   |   |   |   |   |   |   |   |
| Severe grades                              | 0 | 0 | 0 | 0 | 0 | 0 | 0 | 0 |
| Frequent curves                            | 0 | 0 | 0 | 0 | 0 | 0 | 0 | 0 |
| Numerous driveways                         | 0 | 1 | 1 | 1 | 1 | 1 | 1 | 1 |
| Narrow streets                             | 0 | 0 | 0 | 0 | 0 | 0 | 1 | 0 |

|                                                  |   |   |   |   |   |   |   |   |
|--------------------------------------------------|---|---|---|---|---|---|---|---|
| Dumpsters streets                                | 1 | 1 | 0 | 1 | 1 | 1 | 1 | 0 |
| Sewers                                           | 0 | 0 | 0 | 0 | 0 | 0 | 0 | 0 |
| <b>Street &amp; intersection safety features</b> |   |   |   |   |   |   |   |   |
| Stop light                                       | 1 | 0 | 0 | 0 | 0 | 1 | 0 | 1 |
| In-road warning lights                           | 0 | 0 | 0 | 0 | 0 | 0 | 0 | 0 |
| Stop /yield sign                                 | 1 | 1 | 1 | 1 | 1 | 1 | 1 | 1 |
| Posted speed limit                               | 1 | 1 | 0 | 1 | 0 | 1 | 1 | 1 |
| Pedestrian island                                | 0 | 0 | 0 | 0 | 0 | 0 | 0 | 0 |
| Crosswalk                                        | 1 | 1 | 1 | 1 | 1 | 1 | 1 | 1 |
| Pedestrian crosswalk sign                        | 1 | 0 | 0 | 0 | 0 | 0 | 0 | 1 |
| In-road warning lights safety                    | 0 | 0 | 0 | 1 | 0 | 0 | 0 | 0 |
| Roundabouts                                      | 0 | 0 | 0 | 0 | 1 | 0 | 0 | 0 |
| Curb bulb-outs                                   | 0 | 0 | 0 | 0 | 0 | 0 | 0 | 0 |
| Speed-bumps brick roads                          | 0 | 0 | 0 | 0 | 0 | 0 | 0 | 0 |
| Pedestrian overpass/underpass                    | 0 | 0 | 0 | 0 | 0 | 0 | 0 | 0 |
| Midblock crosswalk                               | 0 | 0 | 0 | 0 | 0 | 0 | 0 | 0 |
| Raised crosswalk                                 | 0 | 0 | 0 | 0 | 0 | 0 | 0 | 0 |
| Lane narrowing                                   | 0 | 0 | 0 | 0 | 0 | 0 | 0 | 0 |
| Colored curb cuts                                | 1 | 0 | 1 | 0 | 1 | 1 | 1 | 1 |
| Tactile curb cuts                                | 1 | 0 | 0 | 0 | 1 | 0 | 0 | 1 |
| Emergency phone                                  | 0 | 0 | 0 | 0 | 0 | 0 | 0 | 0 |
| Street lighting                                  | 1 | 1 | 1 | 1 | 1 | 1 | 1 | 1 |
| Police                                           | 0 | 0 | 0 | 0 | 0 | 0 | 1 | 1 |
| <b>Bicycle suitability</b>                       |   |   |   |   |   |   |   |   |
| Bike lane                                        | 0 | 0 | 0 | 1 | 0 | 0 | 0 | 0 |
| Bike racks                                       | 1 | 0 | 0 | 0 | 1 | 0 | 0 | 1 |
| <b>Stray animals</b>                             |   |   |   |   |   |   |   |   |
| Dangerous animals                                | 1 | 1 | 1 | 0 | 0 | 1 | 1 | 1 |

\* 1 indicates the item was observed as present.

\*\* 0 indicates the item was not observed as present.
